# Supplementary material for: A propanesultone-based polymer electrolyte for high-energy solid-state lithium batteries with lithium-rich layered oxides
Source: Royal Society of Chemistry journal article supplement (doi:10.1039/d3ta01968c), 2023-01-01
Supplement: d3ta01968c1.pdf [file d3ta01968c1.pdf]

## Supplementary Information

### **Propanesultone-based polymer electrolyte for high-energy solid-state lithium battery with lithium-rich layered oxides**

Xin Yin<sup>a,b,1</sup>, Shu Zhao<sup>a,b,1</sup>, Zhiyuan Lin<sup>a,b,1</sup>, Xianwei Guo<sup>a,b,\*</sup>, Chenjie Lou<sup>c</sup>, Shiqi Liu<sup>a,b</sup>,  
Boya Wang<sup>a,b</sup>, Peipei Ding<sup>a,b</sup>, Mingxue Tang<sup>c</sup>, Lingqiao Wu<sup>a,b</sup>, Haijun Yu<sup>a,b,\*</sup>

<sup>a</sup> Institute of Advanced Battery Materials and Devices, Faculty of Materials and Manufacturing, Beijing University of Technology, Beijing 100124, PR China

<sup>b</sup> Key Laboratory of Advanced Functional Materials, Ministry of Education, Beijing University of Technology, Beijing 100124, PR China

<sup>c</sup> Center for High Pressure Science & Technology Advanced Research, Beijing 100193, PR China

\* Corresponding authors.

E-mail: hj-yu@bjut.edu.cn (H. Yu), xwguo@bjut.edu.cn (X. Guo)

<sup>1</sup> These authors contributed equally to this paper.

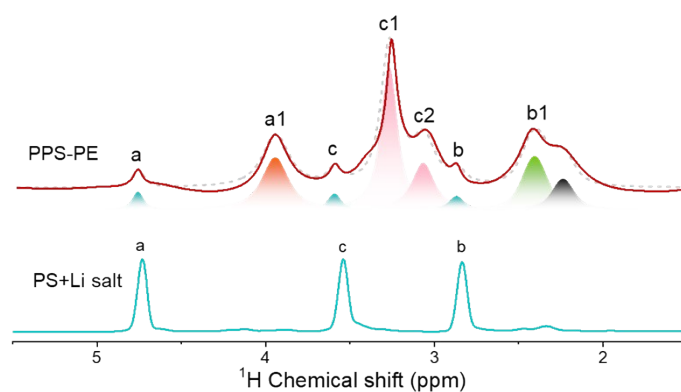

**Fig. S1** The  $^1\text{H}$  spectra and simulations for percent conversion of PPS-PE from PS monomer. The weak peaks in the range of 2.2~2.5 ppm can be indexed to the impurities.

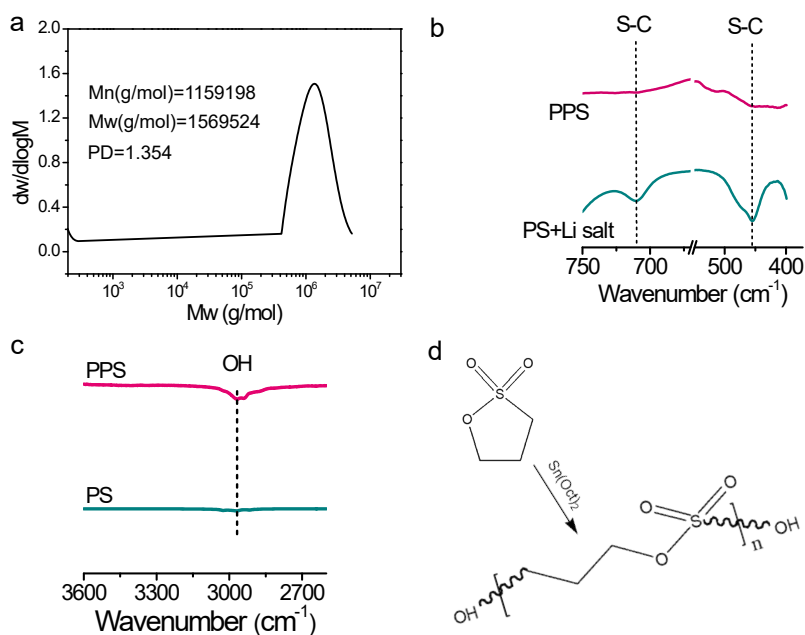

**Fig. S2** a, The GPC test of PPS-PE. b, c, The S-C and -OH bonds in FT-IR spectra of PS+Li salt precursor and PPS-PE. d, The chain-like structure of PPS-PE form PS monomer by  $\text{Sn}(\text{Oct})_2$  catalyzation.

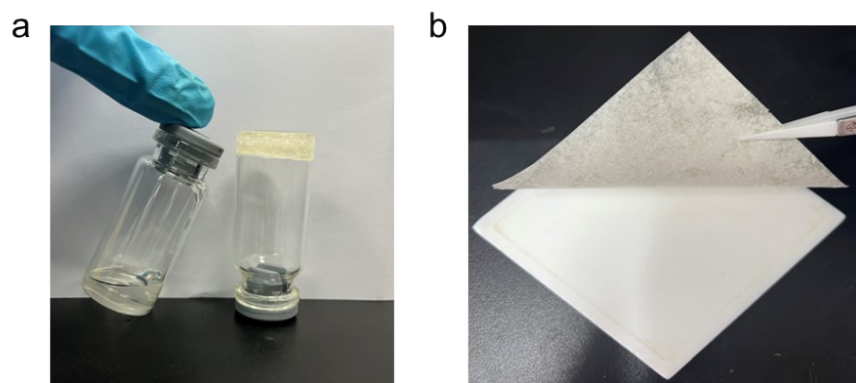

**Fig. S3** a, The photos of PPS-PE before and after polymerization. b, The flexible PPS-PE film.

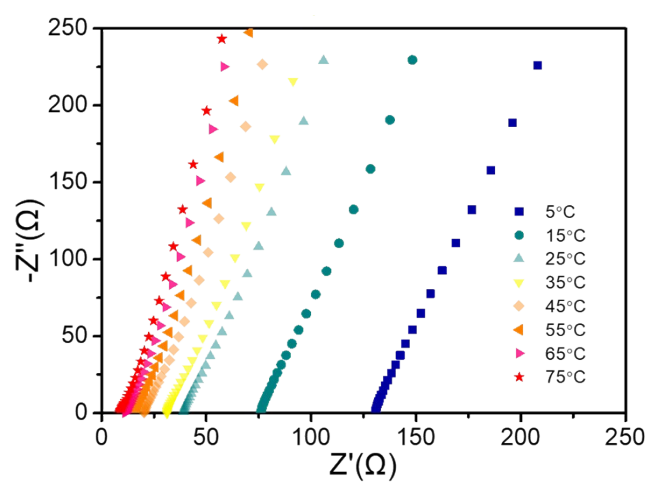

**Fig. S4** The EIS of SS/PPS-PE/SS symmetric cell at different temperatures.

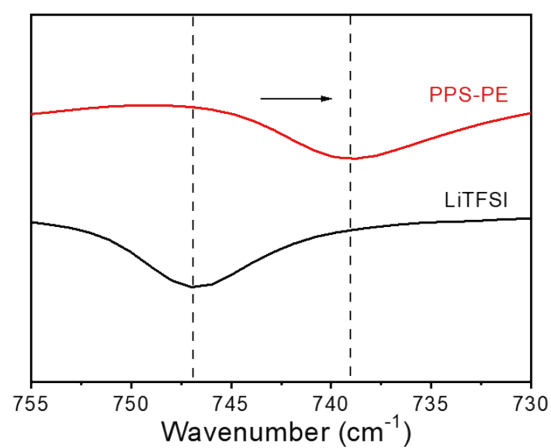

**Fig. S5** The FT-IR spectra of Li salt and PPS-PE.

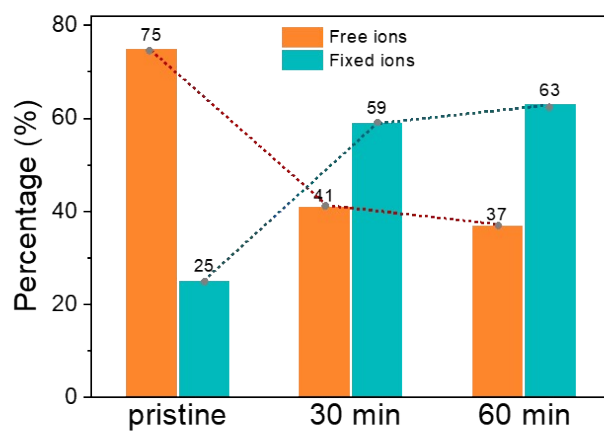

**Fig. S6** The changes of area ratios of free and fixed ions at different states.

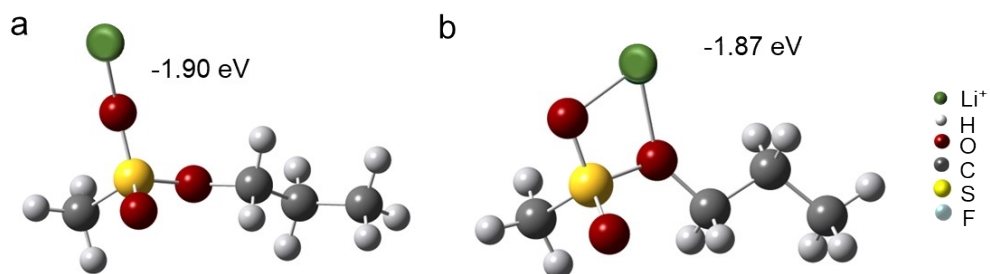

**Fig. S7** The configurations and binding energies between the free Li ion and a, the O atom on S=O group, b, the O atoms on S=O and S-O groups.

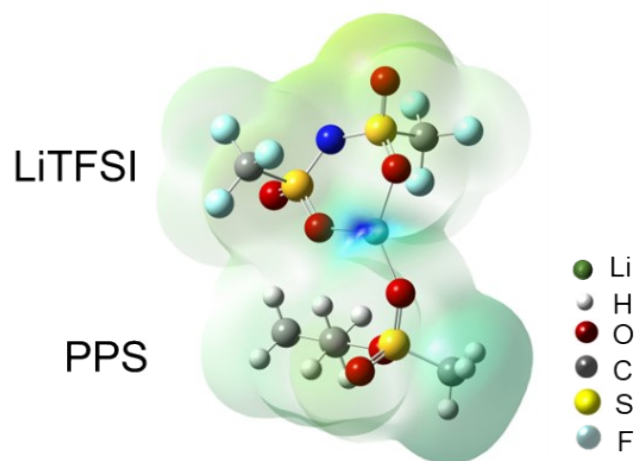

**Fig. S8** The electrostatic potentials with the interaction between LiTFSI and PPS.

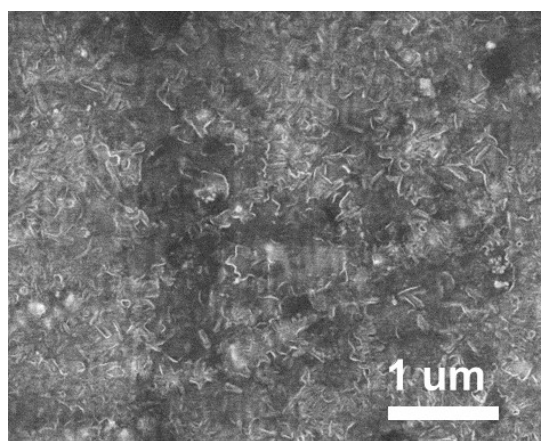

**Fig. S9** The SEM image of Li anode surface after test of battery with PPS-PE.

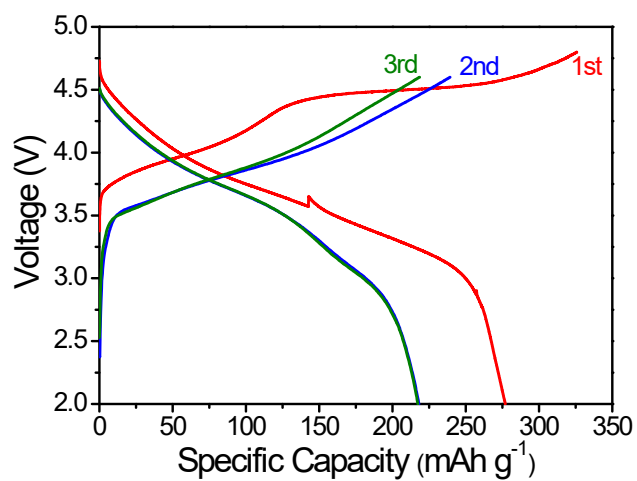

**Fig. S10** The initial charge/discharge curves of liquid electrolyte based battery with LLOs cathode material.

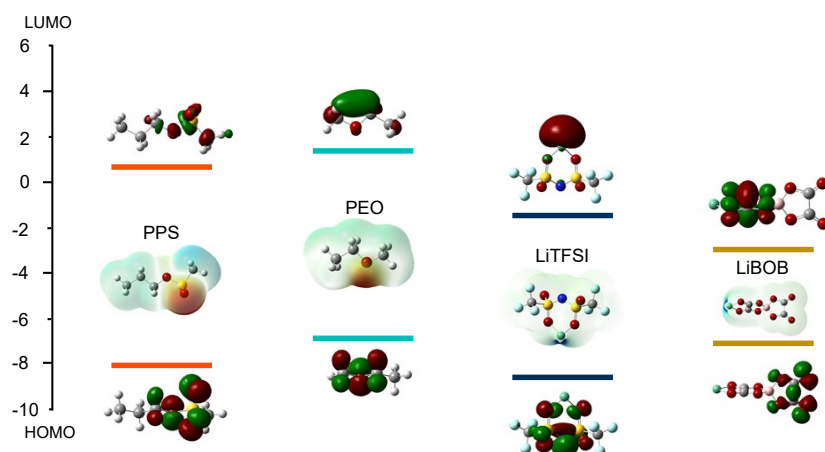

**Fig. S11** The HOMO and LUMO energy levels of PPS, PEO, LiTFSI, LiBOB and the interactions.

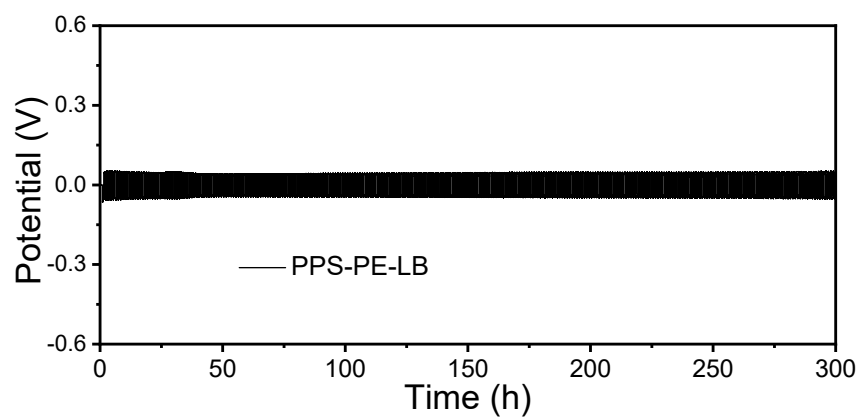

**Fig. S12** The potential profiles of Li plating/stripping in Li/PPS-PE-LB/Li symmetric battery with current density of  $0.1 \text{ mA cm}^{-2}$ .

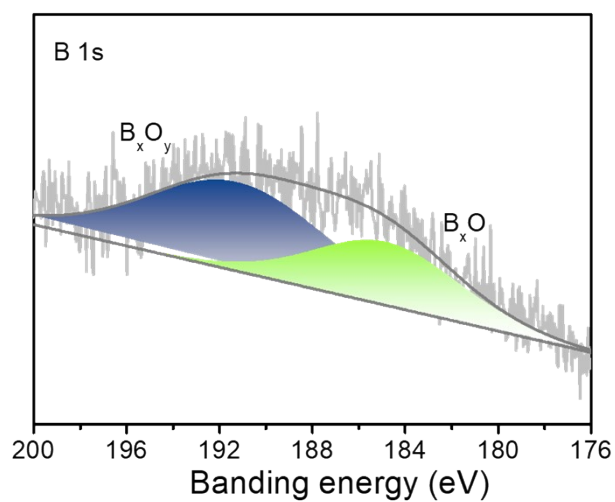

**Fig. S13** The XPS spectra of B element on the cathode side after the cycling of LLOs/PPS-PE/Li battery.

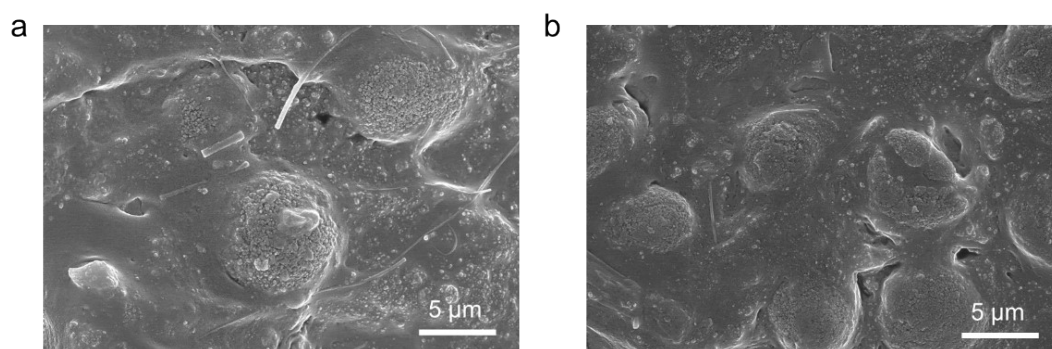

**Fig. S14** The SEM images of composite cathodes in (a) LLOs/PPS-PE/Li and (b) LLOs/PPS-PE-LB/Li batteries after cycling.

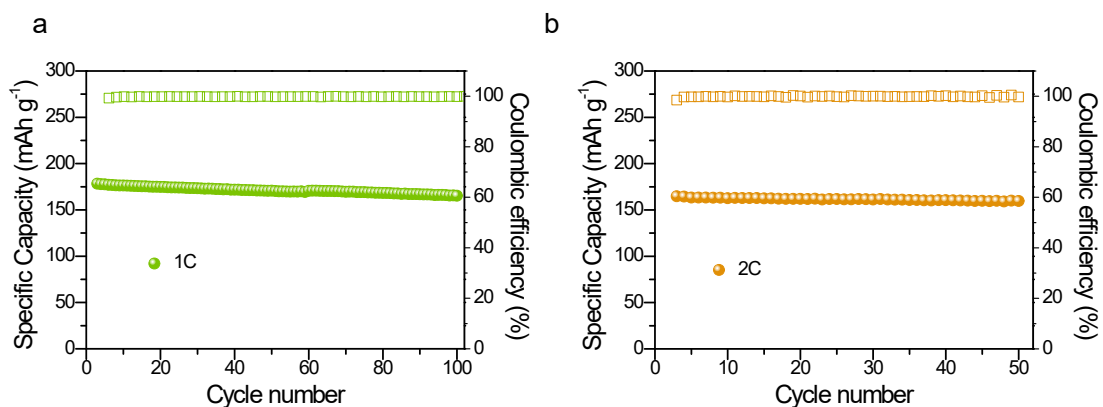

**Fig. S15** The cycling stabilities of LLOs/PPS-PE-LB/Li batteries at current density of (a) 1C and (b) 2C.

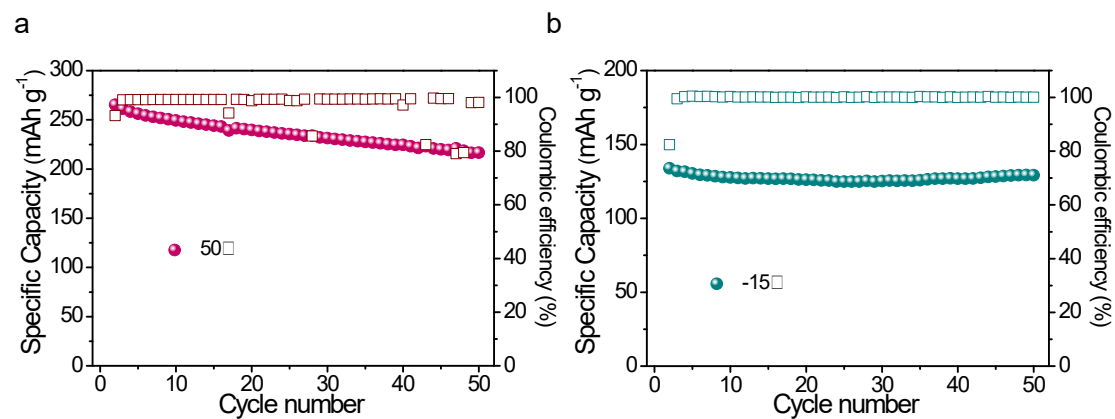

**Fig. S16** The cycling stabilities of LLOs/PPS-PE-LB/Li batteries at (a) 50 °C and (b) -15 °C.

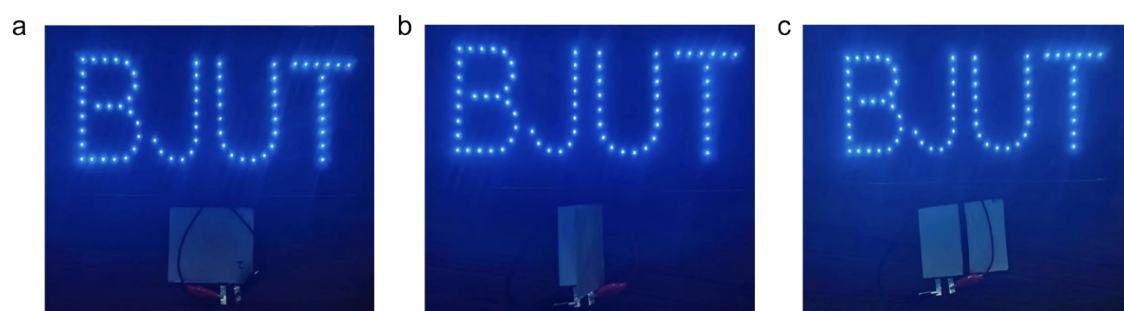

**Fig. S17** The optical photographs for the LLOs/PPS-PE-LB/Li soft package battery that lit up a logo at a, normal, b, wrinkled and c, cutting states.

**Table S1** The relative area for each peak of PS monomer and PPS-PE from **Fig. S1**.

| Type of peak       | PS monomer                                 |      |      | PPS-PE |       |       |       | Impurity |
|--------------------|--------------------------------------------|------|------|--------|-------|-------|-------|----------|
|                    | a                                          | c    | b    | a1     | c1    | c2    | b1    |          |
| Integral area (e9) | 2.36                                       | 2.36 | 2.35 | 16.69  | 28.71 | 12.61 | 14.20 | 7.55     |
| Percent conversion | $(72.21/86.83) / (1-7.55/86.83) = 91.08\%$ |      |      |        |       |       |       |          |

**Table S2** The comparisons of charge voltages of cathode materials in the solid-state batteries, and the ions transference number of polymer electrolytes, which including the  $\text{LiNi}_x\text{Co}_y\text{Mn}_{1-x-y}\text{O}_2$ ,  $\text{LiCoO}_2$ ,  $\text{LiNi}_{0.5}\text{Mn}_{1.5}\text{O}_4$  and Li-rich cathode materials.

| Composition                              | Anode/ Cathode                                                                                 | The Li <sup>+</sup> transference number | Current density                                     | Voltage Range (V)            | Initial discharge capacity (mAh/g) | Cycles     | Final discharge capacity (mAh/g) | Ref.             |
|------------------------------------------|------------------------------------------------------------------------------------------------|-----------------------------------------|-----------------------------------------------------|------------------------------|------------------------------------|------------|----------------------------------|------------------|
| PEGDA+BA+SN/LiTFSI                       | Li/LiNi <sub>0.83</sub> Mn <sub>0.06</sub> Co <sub>0.11</sub> O <sub>2</sub>                   | 0.75                                    | 1.1C                                                | 2.7-4.5V                     | ~170                               | 100        | 140                              | 23               |
| PEGDME/LiTFSI+LiFSI                      | Li/LiNi <sub>0.5</sub> Mn <sub>0.3</sub> Co <sub>0.2</sub> O <sub>2</sub>                      | -                                       | 0.2C                                                | 2.5-4.5V                     | 167                                | 100        | 97                               | 24               |
| VEC+TFEMA/LiTFSI                         | Li/LiNi <sub>0.83</sub> Co <sub>0.11</sub> Mn <sub>0.06</sub> O <sub>2</sub>                   | 0.44                                    | 0.1C<br>(1C=275 mA g <sup>-1</sup> )                | 3.0-4.5V                     | 218                                | 300        | ~153                             | 25               |
| PME+LiPVFM+NMP/<br>LiTFSI+SN             | Li/LiCoO <sub>2</sub>                                                                          | 0.62                                    | 0.5C                                                | 2.8-4.5V                     | 196.3                              | 50         | 180.4                            | 26               |
| VEC/LiTFSI                               | Li/LiCoO <sub>2</sub>                                                                          | 0.4                                     | 0.5C<br>(1C=160 mA g <sup>-1</sup> )                | 3.0-4.5V                     | 154.6                              | 100        | 104.9                            | 27               |
| Uio-66-NH-<br>MET+PEGDA+PETMP/<br>LiTFSI | Li/LiCoO <sub>2</sub>                                                                          | 0.44                                    | 0.5C<br>(1C=148 mA g <sup>-1</sup> )                | 3.0-4.5V                     | 136                                | 100        | 108.8                            | 28               |
| PEGDA+NML+UPyMA/<br>LiTFSI               | Li/LiCoO <sub>2</sub>                                                                          | 0.66                                    | 0.5C<br>(1 C=180 mA g <sup>-1</sup> )               | 3.0-4.6V                     | 188.5                              | 1000       | 150.8                            | 29               |
| CUMA/SN+LiTFSI<br>+LiDFOB                | Li/LiCoO <sub>2</sub>                                                                          | 0.62                                    | 0.5C                                                | 3.0-4.6V                     | ~220                               | 100        | ~181                             | 30               |
| FEC/LiDFOB                               | Li/LiNi <sub>0.5</sub> Mn <sub>1.5</sub> O <sub>4</sub>                                        | -                                       | 0.2C<br>(1C=148 mA g <sup>-1</sup> )                | 3.0-4.9V                     | ~110                               | 20         | ~90                              | 31               |
| PMHS+PEO+DMAA+<br>PS+THF/LiTFSI/Speiers  | Li/LiNi <sub>0.5</sub> Mn <sub>1.5</sub> O <sub>4</sub>                                        | 0.25                                    | 0.1C<br>(1C=170 mA g <sup>-1</sup> )                | 3.5-4.9V                     | 131.5                              | 50         | 126.3                            | 32               |
| PEGDA+NML+UPyMA/<br>LiTFSI               | Li/Li <sub>1.2</sub> Ni <sub>0.13</sub> Co <sub>0.13</sub> Mn <sub>0.54</sub> O <sub>2</sub>   | 0.66                                    | 0.2 C                                               | 2.1-4.9V                     | 225                                | 60         | ~220                             | 29               |
| <b>PS/LiTFSI</b>                         | <b>Li/Li<sub>1.13</sub>Mn<sub>0.517</sub>Ni<sub>0.256</sub>Co<sub>0.097</sub>O<sub>2</sub></b> | <b>0.78</b>                             | <b>0.1C<br/>0.5C<br/>(1C=200 mA g<sup>-1</sup>)</b> | <b>2.0-4.8V<br/>2.0-4.6V</b> | <b>270<br/>208</b>                 | <b>100</b> | <b>192</b>                       | <b>This work</b> |
